# Supplementary material for: A systematic review and meta-analysis of the consequences of female genital mutilation on maternal and perinatal health outcomes in European and African countries
Source: PubMed Central journal article supplement — BMJ Glob Health. 2020 Dec 30;5(12):e003307. doi: 10.1136/bmjgh-2020-003307 (PMC7780522; doi:10.1136/bmjgh-2020-003307), 2020-12-30
Supplement: bmjgh-2020-003307supp001.pdf [file bmjgh-2020-003307supp001.pdf]

**Supplementary text 1. MOOSE Checklist for Meta-analyses of Observational Studies**

| Item No                                     | Recommendation                                                                                                                                                                                                                                                               | Reported on Page No             |
|---------------------------------------------|------------------------------------------------------------------------------------------------------------------------------------------------------------------------------------------------------------------------------------------------------------------------------|---------------------------------|
| Reporting of background should include      |                                                                                                                                                                                                                                                                              |                                 |
| 1                                           | Problem definition                                                                                                                                                                                                                                                           | Page 4                          |
| 2                                           | Hypothesis statement                                                                                                                                                                                                                                                         | Pages 4-5                       |
| 3                                           | Description of study outcome(s)                                                                                                                                                                                                                                              | Page 5, Panel 2                 |
| 4                                           | Type of exposure or intervention used                                                                                                                                                                                                                                        | Page 5, Panel 1                 |
| 5                                           | Type of study designs used                                                                                                                                                                                                                                                   | Page 5                          |
| 6                                           | Study population                                                                                                                                                                                                                                                             | Page 5                          |
| Reporting of search strategy should include |                                                                                                                                                                                                                                                                              |                                 |
| 7                                           | Qualifications of searchers (eg, librarians and investigators)                                                                                                                                                                                                               | Page 6                          |
| 8                                           | Search strategy, including time period included in the synthesis and key words                                                                                                                                                                                               | Page 6                          |
| 9                                           | Effort to include all available studies, including contact with authors                                                                                                                                                                                                      | Page 6                          |
| 10                                          | Databases and registries searched                                                                                                                                                                                                                                            | Page 6                          |
| 11                                          | Search software used, name and version, including special features used (eg, explosion)                                                                                                                                                                                      | Page 9                          |
| 12                                          | Use of hand searching (eg, reference lists of obtained articles)                                                                                                                                                                                                             | Page 6                          |
| 13                                          | List of citations located and those excluded, including justification                                                                                                                                                                                                        | Figure 1                        |
| 14                                          | Method of addressing articles published in languages other than English                                                                                                                                                                                                      | No additional methods necessary |
| 15                                          | Method of handling abstracts and unpublished studies                                                                                                                                                                                                                         | Page 6                          |
| 16                                          | Description of any contact with authors                                                                                                                                                                                                                                      | Page 6                          |
| Reporting of methods should include         |                                                                                                                                                                                                                                                                              |                                 |
| 17                                          | Description of relevance or appropriateness of studies assembled for assessing the hypothesis to be tested                                                                                                                                                                   | Page 7                          |
| 18                                          | Rationale for the selection and coding of data (eg, sound clinical principles or convenience)                                                                                                                                                                                | Panel 1                         |
| 19                                          | Documentation of how data were classified and coded (eg, multiple raters, blinding and interrater reliability)                                                                                                                                                               | Pages 7-8, appendix 2-3         |
| 20                                          | Assessment of confounding (eg, comparability of cases and controls in studies where appropriate)                                                                                                                                                                             | Pages 8-9, appendix 2-3         |
| 21                                          | Assessment of study quality, including blinding of quality assessors, stratification or regression on possible predictors of study results                                                                                                                                   | Page 7-8, appendix 2-3          |
| 22                                          | Assessment of heterogeneity                                                                                                                                                                                                                                                  | Page 8                          |
| 23                                          | Description of statistical methods (eg, complete description of fixed or random effects models, justification of whether the chosen models account for predictors of study results, dose-response models, or cumulative meta-analysis) in sufficient detail to be replicated | Page 8                          |
| 24                                          | Provision of appropriate tables and graphics                                                                                                                                                                                                                                 | Figure 1, Tables 1-7            |
| Reporting of results should include         |                                                                                                                                                                                                                                                                              |                                 |
| 25                                          | Graphic summarizing individual study estimates and overall estimate                                                                                                                                                                                                          | Figure 2-3                      |
| 26                                          | Table giving descriptive information for each study included                                                                                                                                                                                                                 | Table 1                         |
| 27                                          | Results of sensitivity testing (eg, subgroup analysis)                                                                                                                                                                                                                       | Table 2-7                       |
| 28                                          | Indication of statistical uncertainty of findings                                                                                                                                                                                                                            | Not applicable                  |

| Item No                                 | Recommendation                                                                                                            | Reported on Page No                                      |
|-----------------------------------------|---------------------------------------------------------------------------------------------------------------------------|----------------------------------------------------------|
| Reporting of discussion should include  |                                                                                                                           |                                                          |
| 29                                      | Quantitative assessment of bias (eg, publication bias)                                                                    | Not applicable (number of studies for each outcome < 10) |
| 30                                      | Justification for exclusion (eg, exclusion of non-English language citations)                                             | Figure 1                                                 |
| 31                                      | Assessment of quality of included studies                                                                                 | Page 10                                                  |
| Reporting of conclusions should include |                                                                                                                           |                                                          |
| 32                                      | Consideration of alternative explanations for observed results                                                            | Pages 22-24                                              |
| 33                                      | Generalization of the conclusions (ie, appropriate for the data presented and within the domain of the literature review) | Pages 22-25                                              |
| 34                                      | Guidelines for future research                                                                                            | Page 25                                                  |
| 35                                      | Disclosure of funding source                                                                                              | No funding source                                        |

From: Stroup DF, Berlin JA, Morton SC, et al, for the Meta-analysis Of Observational Studies in Epidemiology (MOOSE) Group. Meta-analysis of Observational Studies in Epidemiology. A Proposal for Reporting. *JAMA*. 2000;283(15):2008-2012. doi: 10.1001/jama.283.15.2008.

Transcribed from the original paper within the NEUROSURGERY® Editorial Office, Atlanta, GA, United States. August 2012.

## Supplementary text 2. NEWCASTLE - OTTAWA QUALITY ASSESSMENT SCALE CASE CONTROL STUDIES

Note: A study can be awarded a maximum of one star for each numbered item within the Selection and Exposure categories. A maximum of two stars can be given for Comparability.

### Selection

#### 1) Is the case definition adequate?

- a) yes, with independent validation \*
- b) yes, eg record linkage or based on self-reports
- c) no description

#### 2) Representativeness of the cases

- a) consecutive or obviously representative series of cases \*
- b) potential for selection biases or not stated

#### 3) Selection of Controls

- a) community controls \*
- b) hospital controls
- c) no description

#### 4) Definition of Controls

- a) no history of disease (endpoint) \*
- b) no description of source

### Comparability

#### 1) Comparability of cases and controls on the basis of the design or analysis

- a) study controls for \_\_\_\_\_ (Select the most important factor.) \*
- b) study controls for any additional factor \* (This criterion could be modified to indicate specific control for a second important factor.)

### Exposure

#### 1) Ascertainment of exposure

- a) secure record (e.g. surgical records) \*
- b) structured interview where blind to case/control status \*
- c) interview not blinded to case/control status
- d) written self-report or medical record only
- e) no description

#### 2) Same method of ascertainment for cases and controls

- a) yes \*
- b) no

#### 3) Non-Response rate

- a) same rate for both groups \*
- b) non respondents described
- c) rate different and no designation

## Supplementary text 3. Methodological quality assessment of studies included in the meta-analysis

|                                   | Selection                        |                                         |                                |                                 | Comparability                                                             |                       | Outcome                  |                                              |                   |                                 |
|-----------------------------------|----------------------------------|-----------------------------------------|--------------------------------|---------------------------------|---------------------------------------------------------------------------|-----------------------|--------------------------|----------------------------------------------|-------------------|---------------------------------|
|                                   | Exposed case definition adequate | Representativeness of the exposed group | Selection of non-exposed group | Definition of non-exposed group | Comparability based on socio-demographic factors, maternal age and parity | On additional factors | Ascertainment of outcome | Same method of ascertainment for both groups | Non-response rate | Overall quality score (Max = 9) |
| Andro, 2014 <sup>17</sup>         | *                                | *                                       | *                              | *                               | *                                                                         | *                     | ..                       | *                                            | ..                | 7                               |
| Balachandran, 2017 <sup>12</sup>  | *                                | *                                       | *                              | *                               | *                                                                         | *                     | *                        | *                                            | ..                | 8                               |
| Gebremicheal, 2018 <sup>20</sup>  | *                                | *                                       | *                              | *                               | *                                                                         | *                     | *                        | *                                            | ..                | 8                               |
| Kasim, 2012 <sup>16</sup>         | ..                               | *                                       | *                              | *                               | ..                                                                        | *                     | ..                       | *                                            | ..                | 5                               |
| Larsen, 2002 <sup>14</sup>        | *                                | *                                       | *                              | *                               | *                                                                         | *                     | ..                       | *                                            | ..                | 7                               |
| Milogo-Traore, 2007 <sup>19</sup> | ..                               | *                                       | *                              | *                               | *                                                                         | ..                    | *                        | *                                            | ..                | 6                               |
| Morison, 2001 <sup>22</sup>       | *                                | *                                       | *                              | *                               | *                                                                         | *                     | ..                       | *                                            | ..                | 7                               |
| Slanger, 2002 <sup>21</sup>       | *                                | *                                       | *                              | *                               | ..                                                                        | *                     | ..                       | *                                            | ..                | 6                               |
| Thera, 2013 <sup>18</sup>         | ..                               | *                                       | *                              | *                               | *                                                                         | *                     | *                        | *                                            | ..                | 7                               |
| Wagner, 2015 <sup>15</sup>        | ..                               | *                                       | *                              | *                               | ..                                                                        | *                     | ..                       | *                                            | ..                | 5                               |
| Wuest, 2009 <sup>13</sup>         | *                                | *                                       | *                              | *                               | ..                                                                        | ..                    | *                        | *                                            | ..                | 6                               |
